# Supplementary material
Source: publisher site journal article supplement (https://www.dovepress.com/article/211198)
Supplement: Supplementary file 1 [file get_supplementary_file.php]

Appendix 1: Read code list for community acquired pneumonia

| Code | Term |
| --- | --- |
| A0222 | Salmonella pneumonia |
| A116. | Tuberculous pneumonia |
| A3BX4 | Streptococ pneumon/cause/disease classified/oth chapters |
| A3BXA | Mycoplasma pneumoniae [PPLO] cause/dis classifd/oth chaptr |
| A3BXB | Klebsiella pneumoniae/cause/disease classifd/oth chapters |
| A3By1 | Eaton's agent infection |
| A3By4 | Pleuropneumonia-like organism (PPLO) infection |
| A3C03 | Sepsis due to Streptococcus pneumoniae |
| AB24. | Candidiasis of lung |
| AB30. | Primary pulmonary coccidioidomycosis |
| AB405 | Histoplasma capsulatum with pneumonia |
| AB415 | Histoplasma duboisii with pneumonia |
| H2... | Pneumonia and influenza |
| H20.. | Viral pneumonia |
| H200. | Pneumonia due to adenovirus |
| H201. | Pneumonia due to respiratory syncytial virus |
| H202. | Pneumonia due to parainfluenza virus |
| H203. | Pneumonia due to human metapneumovirus |
| H20y. | Viral pneumonia NEC |
| H20z. | Viral pneumonia NOS |
| H21.. | Lobar (pneumococcal) pneumonia |
| H22.. | Other bacterial pneumonia |
| H220. | Pneumonia due to klebsiella pneumoniae |
| H221. | Pneumonia due to pseudomonas |
| H222. | Pneumonia due to haemophilus influenzae |
| H223. | Pneumonia due to streptococcus |
| H2230 | Pneumonia due to streptococcus, group B |
| H224. | Pneumonia due to staphylococcus |
| H22y. | Pneumonia due to other specified bacteria |
| H22y0 | Pneumonia due to escherichia coli |
| H22y1 | Pneumonia due to proteus |
| H22y2 | Pneumonia - Legionella |
| H22yz | Pneumonia due to bacteria NOS |
| H22z. | Bacterial pneumonia NOS |
| H23.. | Pneumonia due to other specified organisms |
| H230. | Pneumonia due to Eaton's agent |
| H231. | Pneumonia due to mycoplasma pneumoniae |
| H232. | Pneumonia due to pleuropneumonia like organisms |
| H233. | Chlamydial pneumonia |
| H23z. | Pneumonia due to specified organism NOS |
| H240. | Pneumonia with measles |
| H241. | Pneumonia with cytomegalic inclusion disease |
| H242. | Pneumonia with ornithosis |
| H243. | Pneumonia with whooping cough |
| H244. | Pneumonia with tularaemia |
| H245. | Pneumonia with anthrax |
| H246. | Pneumonia with aspergillosis |
| H247. | Pneumonia with other systemic mycoses |
| H2470 | Pneumonia with candidiasis |
| H2471 | Pneumonia with coccidioidomycosis |
| H2472 | Pneumonia with histoplasmosis |
| H247z | Pneumonia with systemic mycosis NOS |
| H24y. | Pneumonia with other infectious diseases EC |
| H24y0 | Pneumonia with actinomycosis |
| H24y1 | Pneumonia with nocardiasis |
| H24y2 | Pneumonia with pneumocystis carinii |
| H24y5 | Pneumonia with toxoplasmosis |
| H24y6 | Pneumonia with typhoid fever |
| H24y7 | Pneumonia with varicella |
| H24yz | Pneumonia with other infectious diseases EC NOS |
| H24z. | Pneumonia with infectious diseases EC NOS |
| H25.. | Bronchopneumonia due to unspecified organism |
| H26.. | Pneumonia due to unspecified organism |
| H260. | Lobar pneumonia due to unspecified organism |
| H2600 | Lung consolidation |
| H261. | Basal pneumonia due to unspecified organism |
| H270. | Influenza with pneumonia |
| H2700 | Influenza with bronchopneumonia |
| H2701 | Influenza with pneumonia, influenza virus identified |
| H270z | Influenza with pneumonia NOS |
| H28.. | Atypical pneumonia |
| H2B.. | Community acquired pneumonia |
| H2y.. | Other specified pneumonia or influenza |
| H2z.. | Pneumonia or influenza NOS |
| H5303 | Abscess of lung with pneumonia |
| H5400 | Hypostatic pneumonia |
| H5401 | Hypostatic bronchopneumonia |
| H56y1 | Interstitial pneumonia |
| Hyu08 | [X]Other viral pneumonia |
| Hyu09 | [X]Pneumonia due to other aerobic gram-negative bacteria |
| Hyu0A | [X]Other bacterial pneumonia |
| Hyu0B | [X]Pneumonia due to other specified infectious organisms |
| Hyu0C | [X]Pneumonia in bacterial diseases classified elsewhere |
| Hyu0D | [X]Pneumonia in viral diseases classified elsewhere |
| Hyu0E | [X]Pneumonia in mycoses classified elsewhere |
| Hyu0F | [X]Pneumonia in parasitic diseases classified elsewhere |
| Hyu0G | [X]Pneumonia in other diseases classified elsewhere |
| Hyu0H | [X]Other pneumonia, organism unspecified |
| SP131 | Other aspiration pneumonia as a complication of care |
| X100E | Pneumonia |
| X100G | Atypical pneumonia |
| X100H | Bacterial pneumonia |
| X100J | Pneumococcal pneumonia |
| X100K | Pneumonic plague |
| X100L | Meningococcal pneumonia |
| X100M | Bronchopneumonia |
| X100N | Chlamydial pneumonia |
| X100O | Neonatal chlamydial pneumonia |
| X100Y | Mycobacterial pneumonia |
| X100b | Pneumonia due to parasitic infestation |
| X100e | Glandular fever pneumonia |
| X100f | Mononuclear interstitial pneumonia |
| X100g | Herpes simplex pneumonia |
| XE0YG | Viral pneumonia |
| XE0YH | Pneumococcal lobar pneumonia |
| XE0YI | Pneumonia with infectious diseases EC |
| XE0YJ | Bronchopneumonia due to unspecified organism |
| XE0ZF | Pneumonia and influenza &/or pneumonia |
| XE0ZH | Pneumonia: [lobar] or [pneumococcal] |
| XM0rv | Pneumonia NOS |
| XSCET | Bacterial infection due to Klebsiella pneumoniae |
| Xa0Y7 | Non-tuberculous mycobacterial pneumonia |
| Xa0lY | Lobar pneumonia |
| Xa7nL | Basal pneumonia |
| Xa7nM | Left lower zone pneumonia |
| Xa7nN | Right lower zone pneumonia |
| Xa7nP | Left upper zone pneumonia |
| Xa7nT | Right middle zone pneumonia |
| Xa7nU | Right upper zone pneumonia |
| Xa97Z | Pulmonary mycobacterium avium-intracellulare infection |
| XaBE9 | Basal pneumonia due to unspecified organism |
| XaBfJ | Secondary bacterial pneumonia |
| XaDsa | Infective pneumonia |
| XaFrU | Postoperative pneumonia |
| XaJEl | Bilateral pneumonia |
| XaYYu | Pneumonia due to human metapneumovirus |
| XaZ1k | Community acquired pneumonia |
